# Supplementary material for: Panoramic snapshot of serum soluble mediator interplay in pregnant women with convalescent COVID-19: an exploratory study
Source: Frontiers journal article supplement (doi:10.3389/fimmu.2023.1176898), 2023-04-12
Supplement: Data_Sheet_1.pdf [file Data_Sheet_1.pdf]

## *Supplementary Material*

### **Panoramic snapshot of serum soluble mediator interplay in pregnant women with convalescent COVID-19: an exploratory study**

Geraldo Magela Fernandes<sup>1†\*</sup>, Lizandra Moura Paravidine Sasaki<sup>1,2†</sup>, Gabriela Profírio Jardim-Santos<sup>1</sup>, Heidi Luise Schulte<sup>1</sup>, Felipe Motta<sup>1</sup>, Ângelo Pereira da Silva<sup>2</sup>, Aleida Oliveira de Carvalho<sup>2</sup>, Yacara Ribeiro Pereira<sup>2</sup>, Caroline de Oliveira Alves<sup>3</sup>, David Alves de Araújo Júnior<sup>2</sup>, Dayde Lane Mendonça-Silva<sup>2</sup>, Karina Nascimento Costa<sup>3</sup>, Maria Eduarda Canellas de Castro<sup>1,2</sup>, Lucas Lauand<sup>3</sup>, Rodrigo de Resende Nery<sup>3</sup>, Rosana Tristão<sup>3</sup>, Patricia Shu Kurizky<sup>1,2</sup>, Otávio de Toledo Nóbrega<sup>1</sup>, Laila Salmen Espindola<sup>1</sup>, Luiz Cláudio Gonçalves de Castro<sup>1,3</sup>, Patrícia Nessralla Alpoim<sup>4</sup>, Lara Carvalho Godoi<sup>4</sup>, Luci Maria Sant Ana Dusse<sup>4</sup>, Jordana Graziela Alves Coelho-dos-Reis<sup>5</sup>, Laurence Rodrigues do Amaral<sup>6</sup>, Matheus de Souza Gomes<sup>6</sup>, Pedro Luiz Lima Bertarini<sup>6</sup>, Joaquim Pedro Brito-de-Sousa<sup>7</sup>; Ismael Artur da Costa-Rocha<sup>7</sup>; Ana Carolina Campi-Azevedo<sup>7</sup>, Vanessa Peruhype-Magalhães<sup>7</sup>, Andrea Teixeira-Carvalho<sup>7</sup>, Alberto Moreno Zaconeta<sup>3§</sup>, Alexandre Anderson de Sousa Munhoz Soares<sup>1,3</sup>, Valéria Valim<sup>8,9</sup>, Ciro Martins Gomes<sup>1,3,10</sup>, Cleandro Pires de Albuquerque<sup>1,2</sup>, Olindo Assis Martins-Filho<sup>7§\*</sup>, Licia Maria Henrique da Mota<sup>1,2,10§</sup>

\* **Correspondence:** Geraldo Magela Fernandes & Olindo Assis Martins Filho. Universidade de Brasília Campus Universitário Darcy Ribeiro, Brasília, DF, 70910-900. Instituto René Rachou, Fundação Oswaldo Cruz. Avenida Augusto de Lima, 1715, Barro Preto, Belo Horizonte, MG, Brazil, 30190-002

#### **1 Supplementary Figures**

Summary of Major Changes in Serum Soluble Mediators in Convalescent COVID-19 at Distinct Pregnancy Trimesters

| Chemokines |                 |                 |                 |                 |                 |                 |
|------------|-----------------|-----------------|-----------------|-----------------|-----------------|-----------------|
|            | HC              |                 |                 | COVID-19        |                 |                 |
|            | 1 <sup>st</sup> | 2 <sup>nd</sup> | 3 <sup>rd</sup> | 1 <sup>st</sup> | 2 <sup>nd</sup> | 3 <sup>rd</sup> |
| CXCL8      |                 | ↓               | ↓               |                 | ↑               | ↑               |
| CCL11      |                 |                 | ↓               |                 | ↓               | ↑               |
| CCL3       |                 | ↓               | ↓               | ↓               | ↑               | ↑               |
| CCL4       |                 | ↑               | ↑               |                 | ↑               | ↓               |
| CCL2       |                 | ↓               | ↓               | ↓               | ↓               | ↑               |
| CCL5       |                 | ↑               | ↑               | ↑               | ↓               | ↑               |
| CXCL10     |                 |                 | ↑               |                 |                 | ↓               |

  

| Pro-Inflammatory Cytokines |                 |                 |                 |                 |                 |                 |
|----------------------------|-----------------|-----------------|-----------------|-----------------|-----------------|-----------------|
|                            | HC              |                 |                 | COVID-19        |                 |                 |
|                            | 1 <sup>st</sup> | 2 <sup>nd</sup> | 3 <sup>rd</sup> | 1 <sup>st</sup> | 2 <sup>nd</sup> | 3 <sup>rd</sup> |
| IL1-β                      |                 |                 | ↓               | ↑               |                 | ↑               |
| IL6                        |                 | ↓               | ↓               | ↓               | ↑               | ↑               |
| TNF-α                      |                 |                 | ↓               |                 | ↑               | ↑               |
| IL-12                      |                 |                 | ↓               |                 | ↑               | ↑               |
| INF-γ                      |                 | ↓               | ↓               |                 | ↑               | ↑               |
| IL-15                      |                 |                 |                 |                 |                 |                 |
| IL-17                      |                 |                 | ↓               |                 | ↑               | ↑               |

  

| Regulatory Cytokines |                 |                 |                 |                 |                 |                 |
|----------------------|-----------------|-----------------|-----------------|-----------------|-----------------|-----------------|
|                      | HC              |                 |                 | COVID-19        |                 |                 |
|                      | 1 <sup>st</sup> | 2 <sup>nd</sup> | 3 <sup>rd</sup> | 1 <sup>st</sup> | 2 <sup>nd</sup> | 3 <sup>rd</sup> |
| IL1-Ra               |                 | ↓               | ↓               | ↓               | ↓               | ↑               |
| IL-4                 |                 |                 | ↓               |                 |                 |                 |
| IL-5                 |                 | ↓               | ↓               | ↑               | ↑               | ↓               |
| IL-9                 |                 | ↓               | ↓               | ↓               | ↑               | ↑               |
| IL-10                |                 |                 | ↓               | ↑               | ↑               |                 |
| IL-13                |                 | ↓               | ↓               |                 | ↑               | ↑               |

  

| Growth Factors |                 |                 |                 |                 |                 |                 |
|----------------|-----------------|-----------------|-----------------|-----------------|-----------------|-----------------|
|                | HC              |                 |                 | COVID-19        |                 |                 |
|                | 1 <sup>st</sup> | 2 <sup>nd</sup> | 3 <sup>rd</sup> | 1 <sup>st</sup> | 2 <sup>nd</sup> | 3 <sup>rd</sup> |
| FGF-basic      |                 | ↓               | ↓               |                 | ↓               | ↑               |
| VEGF           |                 | ↓               | ↓               | ↓               | ↑               | ↑               |
| PDGF           |                 |                 | ↓               |                 |                 |                 |
| G-CSF          |                 |                 | ↓               |                 | ↓               | ↓               |
| GM-CSF         |                 | ↓               | ↓               |                 | ↑               | ↓               |
| IL-2           |                 |                 |                 |                 |                 |                 |
| IL-7           |                 |                 | ↓               | ↑               | ↓               | ↓               |

**Supplementary Figure 1.** Summary of major changes in serum soluble mediators in convalescent COVID-19 at distinct pregnancy trimesters. The levels of chemokines (CXCL8, CCL11, CCL3, CCL4, CCL2, CCL5, CXCL10), pro-inflammatory cytokines (IL-1β, IL-6, TNF-α, IL-12, IFN-γ, IL-15, IL-17), regulatory cytokines (IL-1Ra, IL-4, IL-5, IL-9, IL-10, IL-13) and growth factors (FGF-basic, PDGF, VEGF, G-CSF, GM-CSF, IL-2, IL-7) were measured in serum samples from pregnant women with convalescent COVID-19 at 3-20 weeks after symptoms onset (COVID, n=89) and pre-pandemic non-infected pregnant women as a Healthy Control (HC, n=52). The HC and COVID-19 groups were further categorized into subgroups according to pregnancy trimester, referred as: HC 1<sup>st</sup> (n=21), HC 2<sup>nd</sup> (n=10), HC 3<sup>rd</sup> (n=21) and COVID 1<sup>st</sup> (n=7), COVID 2<sup>nd</sup> (n=34), COVID 3<sup>rd</sup> (n=48). The measurements were carried out by high-throughput multiplex bead array as described in Material and Methods. Multiple comparative analysis was performed by Kruskal-Wallis followed by Dunn's post-test and comparisons between COVID-19 and HC at matching pregnancy trimesters was assessed by Mann-Whitney test. In all cases, significance was considered at p<0.05. Intragroup significant differences were underscored by green and orange arrows, indicating decrease (↓; ↓) or increase (↑; ↑) for comparisons between 2<sup>nd</sup> vs 1<sup>st</sup> and 3<sup>rd</sup> vs 1<sup>st</sup> trimesters. Inter-group significant differences at matching pregnancy trimesters were identified by black arrows, indicating decrease (↓) or increase (↑) for comparisons at 1<sup>st</sup>, 2<sup>nd</sup> and 3<sup>rd</sup> trimesters.

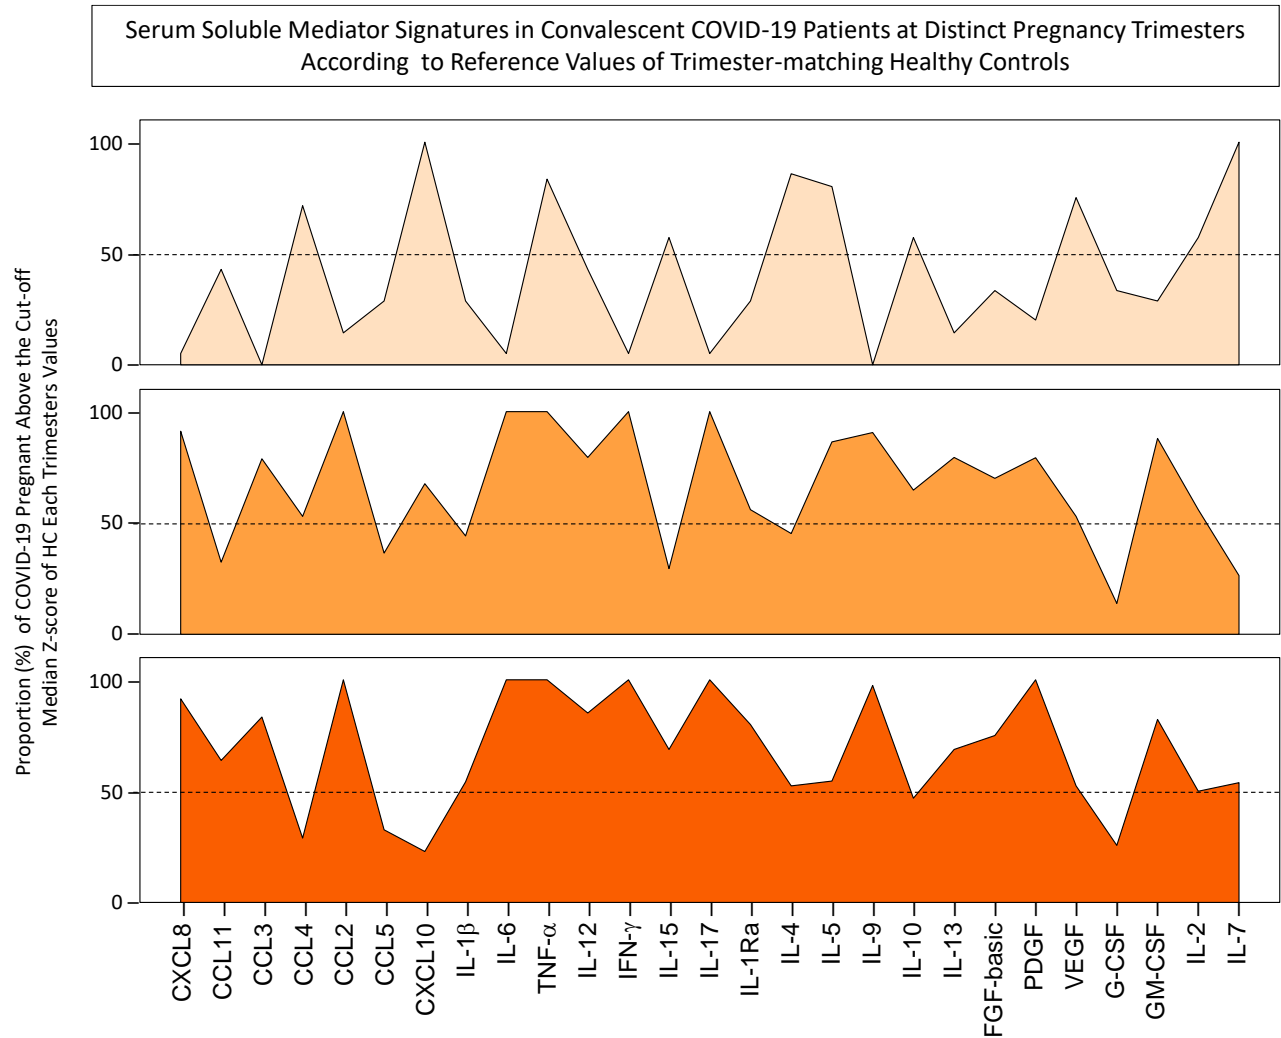

**Supplementary Figure 2.** Serum soluble mediator signatures in convalescent COVID-19 patients at distinct pregnancy trimesters, according to reference values of trimester-matching healthy controls. Signatures of: serum chemokines (CXCL8, CCL11, CCL3, CCL4, CCL2, CCL5, and CXCL10), pro-inflammatory cytokines (IL-1 $\beta$ , IL-6, TNF- $\alpha$ , IL-12, IFN- $\gamma$ , IL-15, and IL-17), regulatory cytokines (IL-1Ra, IL-4, IL-5, IL-9, IL-10, and IL-13), and growth factors (FGF-basic, PDGF, VEGF, G-CSF, GM-CSF, IL-2, and IL-7) were assembled for pregnant women with convalescent COVID-19 at 3-20 weeks after symptom onset (COVID, n=89), categorized into subgroups according to pregnancy trimester, referred to as: COVID 1<sup>st</sup> (□, n=7), COVID 2<sup>nd</sup> (▤, n=34), COVID 3<sup>rd</sup> (■, n=48). The measurements were taken by high-throughput multiplex bead array as described in Material and Methods. The results are presented in line charts, underscoring the area under the curve, showing the proportion (%) of pregnant women with serum levels above the reference values (cut-off) defined as the median Z-score of each soluble mediator detected for HC subgroups at 1<sup>st</sup>, 2<sup>nd</sup> and 3<sup>rd</sup> trimesters as described in material and methods. The serum soluble mediators displaying a proportion of pregnant women above 50% (dashed line) were included in the set of biomarkers with increased levels.
